# Supplementary material
Source: PubMed Central journal article supplement (PMC6451697)
Supplement: mmc1.pdf [file mmc1.pdf]

**Supplemental Data**

**A Syndromic Neurodevelopmental Disorder Caused by  
Mutations in *SMARCD1*, a Core SWI/SNF Subunit Needed for  
Context-Dependent Neuronal Gene Regulation in Flies**

**Kevin C.J. Nixon, Justine Rousseau, Max H. Stone, Mohammed Sarikahya, Sophie Ehresmann, Seiji Mizuno, Naomichi Matsumoto, Noriko Miyake, DDD Study, Diana Baralle, Shane McKee, Kosuke Izumi, Alyssa L. Ritter, Solveig Heide, Delphine Héron, Christel Depienne, Hannah Titheradge, Jamie M. Kramer, and Philippe M. Campeau**

**Figure S1**

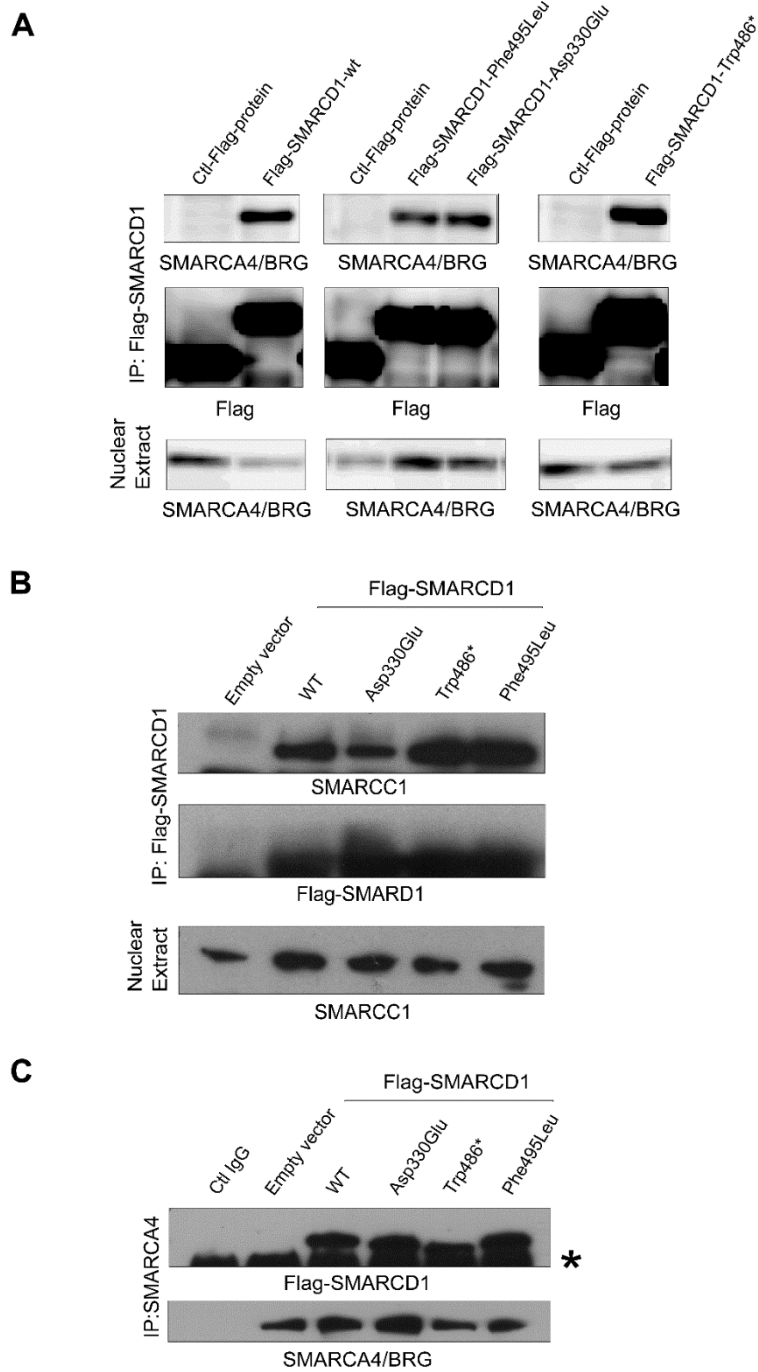

**Figure S1: Mutations in SMARCD1 do not impair its binding to SMARCA4 and SMARCC1. Co-Immunoprecipitation of SMARCA4 (BRG1) (A), SMARCC1 (B), and reciprocally, of SMARCD1 (C) following immunoprecipitation of FLAG-SMARCD1 (A-B) or endogenous SMARCA4 (BRG1) (C) respectively.**

Figure S2

A

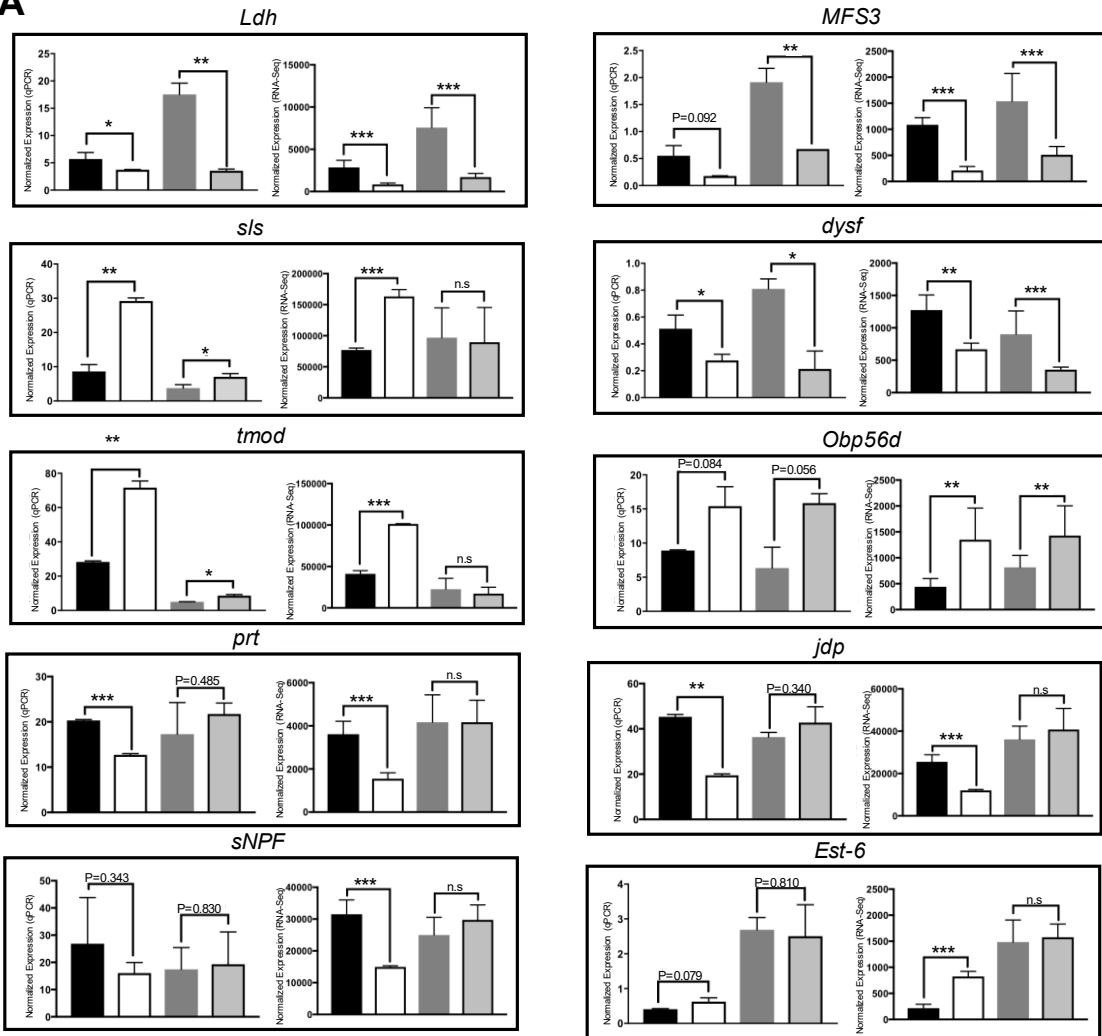

B

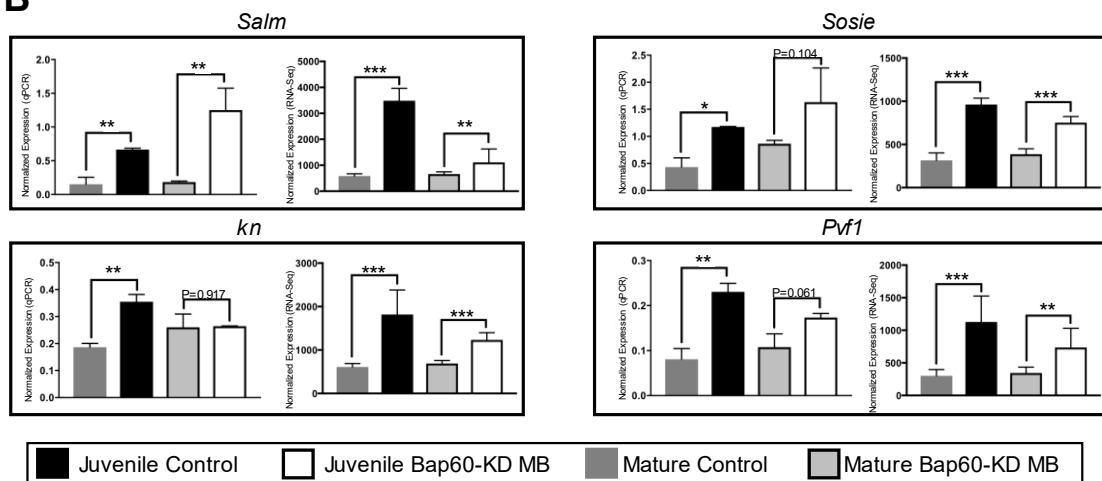

Juvenile Control
  Juvenile Bap60-KD MB
  Mature Control
  Mature Bap60-KD MB

**Figure S2: qPCR validation of RNAseq gene expression changes.** Average normalized gene expression  $\pm$  SD of genes as measured through RT-qPCR (left panel) and RNA-Seq (right panel) in Bap60-KD MB and control mushroom body (MB) samples. RT-qPCR gene expression is normalized to the housekeeping genes *Eif2 $\beta$*  and  *$\beta$ cop* and RNA-Seq gene expression is normalized by DESeq2. **(A)** Validation of overall gene expression trends for *Ldh*, *MFS3*, *sls*, *dysf*, *tmod*, *Obp56d*, *prt*, *jdp*, *sNPF*, and *Est-6*. Comparisons were made between juvenile control and juvenile Bap60-KD MB and between mature control and mature Bap60-KD MB. Genes validated by RT-qPCR were: *Ldh*, *sls*, *dysf*, *tmod*, *prt*, and *jdp*. Genes that were showing similar trends between RT-qPCR and RNA-Seq were: *MFS3*, *Obp56d*, and *Est-6*. *sNPF* could not be validated by RT-qPCR due to variation between biological replicates. **(B)** Validation of gene expression trends of developmental genes: *Salm*, *Sosie*, *kn*, and *Pvf1* that were induced in juvenile control flies, but not juvenile Bap60-KD MB. Comparisons were made between mature control and juvenile control and between mature Bap60-KD MB and juvenile Bap60-KD MB. Genes validated were: *Kn* and *Pvf1*. *Sosie* is validated despite variability of the data. Not validated is: *Salm*. Significance for RT-qPCR is determined by Student's t-test; significance for RNA-Seq is determined by binomial Wald test (DESeq2); \*p<0.05, \*\*p<0.01, \*\*\*p<0.001.

**Table S3: Additional clinical information.**

| Individual                             | 1            | 2                                                                                        | 3                                                                               | 4                                              | 5                                                                                               |
|----------------------------------------|--------------|------------------------------------------------------------------------------------------|---------------------------------------------------------------------------------|------------------------------------------------|-------------------------------------------------------------------------------------------------|
| Microarray (aCGH)                      | NA           | normal                                                                                   | normal                                                                          | normal                                         | normal                                                                                          |
| Country of Origin and ethnicity        | Japan, asian | France                                                                                   | UK, white                                                                       | Northern Ireland, white                        | USA / European, German                                                                          |
| Pregnancy issues                       |              | Antenatal diagnosis of agenesis of the corpus callosum                                   | Reduced fetal movements, scans suggested large head                             | Delivery: Emergency CS for failure to progress | IUGR and small head size noted in 3 <sup>rd</sup> trimester                                     |
| Perinatal complications                |              | Macrosomia at birth. Feeding difficulties with feeding tube during 15 days               | very quiet baby, poor bowel movements with loose stools                         | Didn't cry at birth; stridor for several weeks | Mild jaundice at birth; gastroesophageal reflux as infant                                       |
| Hypotonia                              | Yes          | no                                                                                       | yes, still evident but milder                                                   | yes - congenital, severe                       | No                                                                                              |
| Intellectual disability                | Yes          | yes                                                                                      | Yes                                                                             | Severe                                         | Too young to determine                                                                          |
| Details on development and IQ          |              | 4 years 9 m : WPPSI Performance IQ 75, verbal IQ 50<br><br>Has special educational needs | Has a statement of special educational needs and attends a special needs school | Profound disability                            | Receiving special instruction, physical and speech therapy<br>No formal IQ testing at this time |
| Other diagnosis such as ADHD or Autism |              | Behavioral disorders, frustration intolerance                                            | No formal diagnosis of autism but has obsessive traits.                         | No                                             | No                                                                                              |
| Unusual anxieties                      |              |                                                                                          | Anxiety of new things                                                           | NA                                             | Very anxious with health                                                                        |

|                     |    |    |                                                                      |                                                                            |                                                          |
|---------------------|----|----|----------------------------------------------------------------------|----------------------------------------------------------------------------|----------------------------------------------------------|
|                     |    |    | and new situations and large places eg shopping centres              |                                                                            | care providers                                           |
| Medications         |    | No | Domperipdon e, lazoparole, antibiotics                               | Omeprazole                                                                 | none                                                     |
| Seizures            | No | no | none                                                                 | No                                                                         | none                                                     |
| Vision impaired     | No | no | Yes, plus nystagmus                                                  | alternating divergent squint                                               | No – mild astigmatism not requiring glasses/intervention |
| Frequent infections |    | no | frequent ear infections, tonsillitis. Necessitating hospitalisations | Yes; respiratory as baby                                                   | Frequent ear infection s/sp BMT                          |
| Surgeries           |    | no | ENT-adenioids, tonsils removed and grommets inserted.                | PEG, surgery for undesc testes                                             | BMT for frequent ear infections                          |
| Further information |    |    | oral dyspraxia,                                                      | elevated T3 as baby; normalised frequent UTIs; mottled skin on legs & arms |                                                          |

**Table S4. Results of *in silico* pathogenicity prediction tools for identified *SMARCD1* variants.**

|             | Conservation scores          |                              |     |                                |                                   |                                                  |                                                |                                                     |                                                   |                                              | Functional         |                       | General                          |                              |                              |                          |
|-------------|------------------------------|------------------------------|-----|--------------------------------|-----------------------------------|--------------------------------------------------|------------------------------------------------|-----------------------------------------------------|---------------------------------------------------|----------------------------------------------|--------------------|-----------------------|----------------------------------|------------------------------|------------------------------|--------------------------|
|             | Polyphen2 <sup>65</sup> HDIV | Polyphen2 <sup>65</sup> HVAR | LRT | MutationAssessor <sup>66</sup> | GERP++ <sup>67</sup> RS rankscore | phyloP <sup>68</sup> 100way vertebrate rankscore | phyloP <sup>68</sup> 20way mammalian rankscore | phastCons <sup>69</sup> 100way vertebrate rankscore | phastCons <sup>69</sup> 20way mammalian rankscore | SiPhy <sup>70</sup> _29way logOdds rankscore | SIFT <sup>71</sup> | PROVEAN <sup>72</sup> | FATHMM <sup>73</sup> -MKL coding | MutationTaster <sup>74</sup> | DANN <sup>75</sup> rankscore | CADD <sup>76</sup> phred |
| p.Asp330Glu | D                            | D                            | D   | M                              | 0.393                             | 0.26                                             | 0.165                                          | 0.424                                               | 0.75                                              | 0.537                                        | D                  | D                     | D                                | D                            | 0.816                        | 26.8                     |
| p.Arg446Gly | B                            | B                            | N   | M                              | 0.173                             | 0.389                                            | 0.044                                          | 0.715                                               | 0.625                                             | 0.36                                         | D                  | D                     | D                                | D                            | 0.698                        | 20.9                     |
| p.Trp486*   | .                            | .                            | D   | .                              | 0.693                             | 0.997                                            | 0.605                                          | 0.715                                               | 0.697                                             | 0.934                                        | .                  | .                     | D                                | D                            | 0.559                        | 39                       |
| p.Phe495Leu | B                            | B                            | D   | M                              | 0.693                             | 0.886                                            | 0.626                                          | 0.715                                               | 0.888                                             | 0.744                                        | T                  | D                     | D                                | D                            | 0.182                        | 14.24                    |
| p.Arg503*   | .                            | .                            | D   | .                              | 0.602                             | 0.502                                            | 0.391                                          | 0.715                                               | 0.75                                              | 0.684                                        | .                  | .                     | D                                | D                            | 0.732                        | 41                       |

D, deleterious or damaging; B, benign; M, medium; N, neutral; T, tolerated.

Shaded are the damaging predictions, those with rank scores above 0.5, and CADD phred scores above 25.

**Table S7: RT-QPCR primers**

| <b>Gene</b>   | <b>Forward Primer</b>  | <b>Reverse Primer</b>   |
|---------------|------------------------|-------------------------|
| <i>Ldh</i>    | AGATCCTGACTCCCACCGAA   | GCCTGGACATCGGACATGAT    |
| <i>MFS3</i>   | GCCTCCAATGTGACGGCTAA   | GTAGCAGCTCAGCAGGGTTC    |
| <i>sls</i>    | ATCTCCTATTCGAGTGGAGTGG | CCCTGCAAATTCTCGGCAAG    |
| <i>dysf</i>   | CGGAGATAGCCAATCTGAGG   | GCTTTCCGCACATAGACACA    |
| <i>tmod</i>   | GCAAGGATCTGAGTGAGTACGA | GCCAGTATGGTTATCTCCTCGG  |
| <i>Obp56d</i> | TCCAGCCCAGTGTGTTCT     | CCCTTGGTGGCATCACACT     |
| <i>prt</i>    | ATGTCCGAGAAATCGAACCGT  | GGGGCATTCAATTGAACAGC    |
| <i>jdp</i>    | GGAAACCTTGTGCGATCCC    | AGCCACTGTTTGTAGCTCATC   |
| <i>sNPF</i>   | CGATCTGGGTGCCGACTAC    | CCTCGAACTGAGGAACACTGC   |
| <i>Est-6</i>  | TGGGACTGGGACTTATCATTGT | CTGCACCAACAGAGGGTCATC   |
| <i>Salm</i>   | GAGCAAAGCACACCAGACCA   | ATCGCCACTCTGTTGTTGTTAT  |
| <i>Sosie</i>  | ATGGTGTGCCAGTACGAGAAC  | TCGCAGAGACACAGCTTGG     |
| <i>kn</i>     | CGCGCCCACTTTGAAAAGC    | GTTGTCCAGCCCGATCATATAAG |
| <i>Pvf1</i>   | CTGTCCGTGTCCGCTGAG     | CTCGCCGGACACATCGTAG     |
| <i>Eif2β</i>  | CAGACCCTTAACCTTAGCTCCG | GATGGTCAAATCTGAGACCTGG  |
| <i>βcop</i>   | AGCGGGTAATCAAGTTGCTG   | GGCAGGACGAAGCGTATGA     |



## Supplementary Methods

### Co-Immunoprecipitation

HEK293T and SK-N-AS were cultured in DMEM, 10% FBS (Wisent), 1X AA and 1X Glutamax all from ThermoFisher Scientific. SK-N-AS media was supplemented with 0.1mM NEAA (ThermoFisher Scientific) and 25mM HEPES (Wisent). pcDNA.3.1-Flag-SMARCD1 wild type (NM\_003076.4) or SMARCD1-c.990C>G (p.Asp330Glu), c.1457G>A (p.Trp486\*) and c.1483T>C (p.Phe495Leu) were transfected using jetPRIME (Polyplus-transfection) according to the manufacturer's instructions. After 48h, cells were washed once with ice-cold phosphate-buffered saline, lysed in a hypotonic buffer (25 mM HEPES pH 7.9, 25 mM KCL, 50mM EDTA, 5 mM MgCl<sub>2</sub>, 10% glycerol, 0.1% NP40, 1 mM DTT, complete mini protease inhibitors (Sigma-Aldrich)), and centrifuge at 3000 rpm for 3 minutes. The pelleted nuclei fraction (NE) was resuspended in nuclear lysis buffer (25 mM Tris, pH8, 150 mM NaCl, 1 mM EDTA, 1% triton, 5% glycerol, complete mini protease inhibitors), incubated 30 min at 4 degrees and centrifuge at 13 000 rpm for 20 min. For immunoprecipitation, nuclear extracts (100 to 300ug) were incubated with either pre-coupled M2 anti-FLAG (M8823, Sigma-Aldrich) or anti-Brg1 (H10) coupled to Dynabeads (ThermoFisher Scientific) magnetic beads. After 1.5 and 4 hours respectively, beads were washed 4 times and proteins eluted directly in 1X laemmli loading buffer supplemented with 50 mM DTT. Western blot was performed using the following antibodies: anti-SMARCC1 (PCRP-SMARCC1-1F1, DSHB), BRG-1 (H10) (sc-374197, Santa-Cruz), anti-FLAG M2 (368791, Sigma-Alrich), anti-BRG/BRM (J1) (a generous gift from J.Lessard, IRIC).

## Reverse Transcriptase Quantitative Polymerase Chain Reaction (RT-qPCR)

Mushroom body nuclei were isolated from 3 biological replicates from both mature and juvenile Bap60-KD MB and control flies in an independent INTACT experiment followed by RNA isolation (see Methods). cDNA was synthesized using the SensiFAST cDNA Synthesis Kit (FroggaBio) following manufacturer's instructions. Quantitative PCR was performed on a BioRad CFX 384 using the SensiFAST SYBR No-ROX Kit (FroggaBio) following manufacturer's instructions using the primers listed in **Table S7**. Relative expression was determined using the  $\Delta\Delta C_t$  method normalized for the reference genes *eIF2 $\beta$*  and  *$\beta$ cop*.
